1  
2  
3  
4  
5  
6  
7  
8  
9  
10  
11  
12  
13  
14  
15  
16  
17  
18  
19  
20  
21  
22  
23  
24  
25  
26  
27  
28  
29  
30  
31  
32  
33

**The appropriateness of empirical antibiotic therapy in the management of symptomatic urinary tract infection patients-A cross sectional study in Nairobi County, Kenya**

Hellen A. Onyango<sup>1,2,3\*</sup>, Derek J Sloan<sup>1</sup>, Katherine Keenan<sup>2</sup>, Mike Kesby<sup>2</sup>, Caroline Ngugi<sup>3</sup>, Humphrey Gitonga<sup>4</sup>, Robert Hammond<sup>1</sup>.

<sup>1</sup>School of Medicine, University of St Andrews, Scotland, United Kingdom.

<sup>2</sup>School of Geography and Sustainable Development, University of St Andrews, Scotland, United Kingdom.

<sup>3</sup>College of Health Sciences, Jomo Kenyatta University of Agriculture and Technology, Nairobi, Kenya.

<sup>4</sup>Centre for Microbiology Research, Kenya Medical Research Institute, Nairobi, Kenya.

Corresponding author\*

Hellen A. Onyango; E-mail: [haol@st-andrews.ac.uk](mailto:haol@st-andrews.ac.uk), [helenonyango@jkuat.ac.ke](mailto:helenonyango@jkuat.ac.ke)

## 34 **Abstract**

35 **Background:** In low- and- middle income countries, symptomatic urinary tract infection (UTI)  
36 patients are often prescribed antibiotics without microbiological confirmation. UTIs caused by  
37 antibiotic resistant bacteria are increasingly common and this heightens the risk of empirical  
38 treatment failure. This study evaluates the appropriateness of empirical antibiotic therapy to  
39 symptomatic UTI patients.

40 **Methods:** A hospital-based, cross-sectional study was conducted in Nairobi County, Kenya  
41 among symptomatic adult and child patients. UTI was defined as a monoculture growth with  
42 colony counts of  $\geq 10^4$  cfu/ml. Antimicrobial susceptibility testing (AST) was performed by  
43 the Kirby-Bauer disc diffusion method. Empirical therapy was considered appropriate if the  
44 pathogen isolated was susceptible to the prescribed antibiotic and inappropriate if pathogen  
45 was resistant to prescribed antibiotic.

46 **Results:** A total of 552 participants were enrolled with a median age of 29 years (IQR:24-36).  
47 The majority were female; 398 (72%). Of the 552, 274 (50%) received empirical antibiotic  
48 therapy, 95/274 (35%) were confirmed to have UTI by culture. The antibiotics most frequently  
49 prescribed were fluoroquinolones [ciprofloxacin in 80 (30%) and levofloxacin 43 (16%)],  
50 amoxicillin-clavulanic-acid in 48 (18%), and nitrofurantoin in 32 (12%). Amongst the 95  
51 patients with bacteriological confirmation of UTI, 50 (53%) received appropriate empirical  
52 antibiotic therapy, whilst for 38 (40%) participants, the therapy was inappropriate.  
53 Appropriateness of empirical therapy to 7 (7%) patients could not be determined as the  
54 antibiotics prescribed were not in the AST panel.

55 **Conclusion:** The complexity of appropriate empirical treatment for UTIs is compounded by  
56 high levels of resistance in UTI pathogens. AMR surveillance strategies that could help in  
57 designing appropriate empirical regimens in resource constrained settings should be adopted  
58 for optimal empiric therapy.

## 59 **1. Introduction**

60 Antimicrobial resistance (AMR) is the ability of microorganisms to circumvent the toxic action  
61 of antimicrobial substances that otherwise would kill or inhibit them.<sup>1</sup> The prevalence of  
62 resistance in common disease-causing bacteria has increased globally, both in healthcare and  
63 community settings.<sup>2</sup> Consequently, the WHO has now listed AMR as an emerging public  
64 health threat believed to account for over 700,000 deaths per year.<sup>3</sup> The burden of AMR is  
65 estimated to be highest in low-and-middle income countries (LMICs), particularly in Africa,<sup>4</sup>  
66 where morbidity and mortality from infectious diseases is high, and health facilities less well-  
67 resourced than those in high income regions.<sup>5,6</sup> Large regional, interdisciplinary studies,  
68 including the Holistic Approach to Unravel Antimicrobial resistance in East Africa (HATUA)  
69 project which was run across Kenya, Uganda, and Tanzania, have reported multiple drivers of  
70 AMR. Relevant factors ranged from inappropriate antibiotic prescriptions, to widespread non-  
71 prescription-based dispensing of antimicrobials for self-medication, antibiotic use in animals,  
72 environmental factors such as sanitation, as well as social-economic and structural drivers  
73 including the cost of seeking healthcare.<sup>7-9</sup> In hospital settings, factors such as inadequate  
74 diagnostic capabilities, poor antibiotic stewardship practices, poor adherence to treatment  
75 guidelines and lack of AMR surveillance have been associated with resistance.<sup>6,10</sup>

76 Urinary tract Infections (UTIs) are among the most common community-acquired bacterial  
77 infections, and are the second most frequent clinical indication for antibiotic use.<sup>11</sup> after  
78 respiratory infections.<sup>12</sup> Patients with suspected UTI are often initiated on antibiotic treatment  
79 before culture results are available. However, in some cases, approximately 40% of the bacteria  
80 that cause UTI are resistant to the antimicrobials prescribed.<sup>13</sup> In the recent past, the prevalence  
81 of multi-drug resistant (MDR) bacteria associated with UTI has increased,<sup>14</sup> making selection  
82 of therapy for community acquired UTI complex. Guidelines for uncomplicated UTI treatment  
83 recommend customization of therapy based on local practice, circulating resistant organisms,

84 drug availability and price.<sup>15</sup> In Nairobi County, Kenya where this study was undertaken,  
85 nitrofurantoin 100mg, amoxicillin-clavulanic-acid 625mg, and amikacin 15-30mg/kg are  
86 recommended empirical antimicrobial therapy for community acquired UTIs.<sup>16</sup> For recurrent  
87 infections, the guideline recommends that empirical therapy be guided by previous culture  
88 results pending urine culture and sensitivity results. Once available, therapy is tailored to  
89 prescribe the most narrow spectrum efficacious antibiotic wherever possible.<sup>16</sup>

90 The selection of empirical therapy for UTI management is dependent on knowledge of  
91 circulating pathogens and their antimicrobial resistance patterns.<sup>17</sup> Of concern, therefore, is the  
92 lack of susceptibility data for community acquired UTI's in many LMICs, including Kenya.  
93 This is mostly due to challenges with culture and susceptibility testing, some of which include  
94 infrastructural constraints, limited funding, prolonged turnaround times (TAT), and lack of  
95 skilled personnel.<sup>4,18</sup> There is relatively limited information on the appropriateness of empirical  
96 antibiotic therapy in the management of community acquired UTI's in LMICs. This study seeks  
97 to address the paucity of microbiological information on management of microbiologically  
98 confirmed UTI in symptomatic patients and evaluates the appropriateness of empirical UTI  
99 treatment based on culture and susceptibility results.

## 100 **2. Materials and Methods**

### 101 **2.1. Study design**

102 A hospital-based cross-sectional study design was employed to recruit adult and child patients  
103 with UTI-like symptoms between July 2022 to April 2023.

### 104 **2.2 Study setting**

105 The participants were recruited from Mama Lucy Kibaki Hospital (MLKH) and Mbagathi  
106 County Hospital (MCH) located within Nairobi County, as shown in **Figure 1**. The Kenyan

107 healthcare system is structured in a hierarchical manner consisting of six levels I-VI in  
108 ascending order. MLKH and MCH are Level - V public referral hospitals. MCH and MLKH  
109 serve a large catchment area comprising both the middle and low socio-economic groups. The  
110 two hospitals were selected as there was limited information on the resistance profiles of  
111 circulating uropathogens and UTI patients are often treated empirically without culture  
112 confirmation.

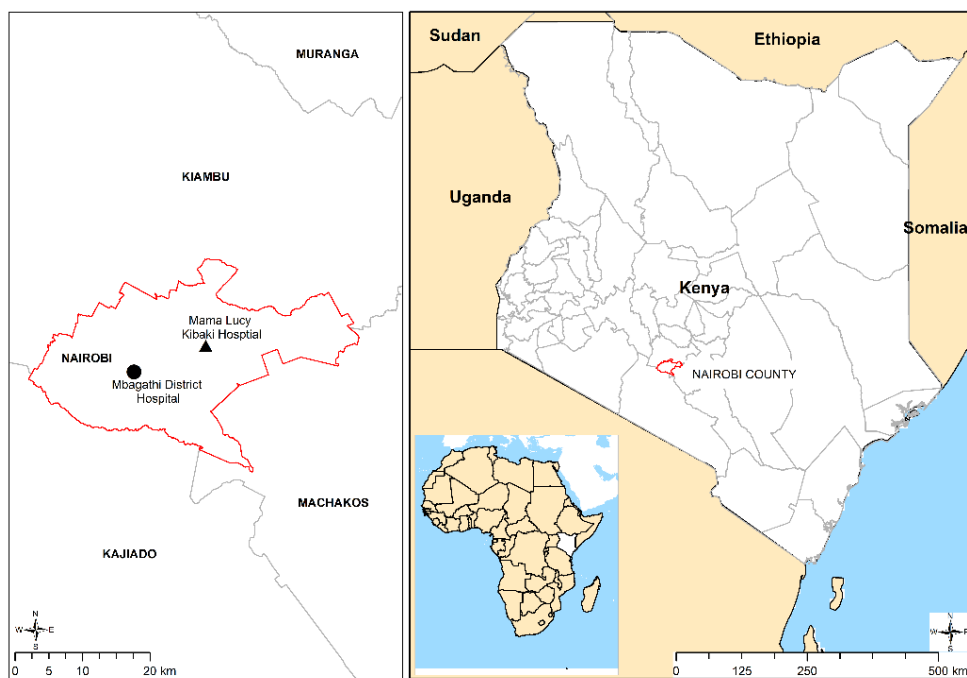

113

114 **Figure 1:** Location of study sites, MLKH and MCH within Nairobi County, Kenya.

### 115 **2.3 Participant recruitment and sample collection**

116 A resident clinician identified adult ( $\geq 18$  years) and child (5-17 years) outpatients presenting  
117 with one or more symptoms suggestive of UTI or for other causes that made the clinician to  
118 believe they might also have a UTI. The symptoms included lower abdominal pain, dysuria,  
119 strong persistent urge to urinate, haematuria, frequent micturition and/or unexplained fever  
120 ( $\geq 38^{\circ}\text{C}$ ), persistent irritability, and suprapubic pain/tenderness to palpation in children. In  
121 addition to meeting the criteria of a presumptive UTI case, the participants had to meet the  
122 following criteria: report living within a 50 km radius from the hospital facility, have a mobile

123 telephone number, and be able to speak/understand/write either English or Kiswahili. The study  
124 objectives were explained and patients willing to participate were taken through informed  
125 consent document (ICD) in their preferred language. Consent was obtained from adult patients  
126 ( $\geq 18$  years). Assent and consent were obtained for participants aged 13-17 years. Parents/  
127 guardians of participants aged  $< 13$  years consented on their behalf. Consenting participants  
128 signed and dated the consent forms. Participants/guardians who were not able to sign marked  
129 the consent with a thumb print. Consenting participants were issued with a unique identifiable  
130 number which linked their bar-coded consent form, demographic data questionnaire, and urine  
131 sample collection container. Self-collected midstream urine on a 20 mL sterile plain screw-  
132 capped universal bottles was obtained from each patient after guidance on the collection  
133 procedure. Parents/guardians were guided on how to collect midstream urine from their  
134 children. The samples were stored in a cool box ( $4^{\circ}\text{C}$ ) and transported to the Kenya Medical  
135 Research Institute (KEMRI) laboratory for processing within 2 hours.

## 136 **2.4 Data collection**

137 A questionnaire was used to collect self-reported demographic information (age, gender), and  
138 previous antimicrobial use. Data regarding empirical antibiotic treatment was obtained from  
139 prescriptions administered to the patients during the hospital visit. All data were captured  
140 electronically into an epicollect database (<https://five.epicollect.net> is a free open-source data  
141 [collection tool](#)) and later linked to the laboratory urine culture results.

## 142 **2.5 Microbiological tests**

### 143 **2.5.1 Urine culture**

144 Using a standard sterile loop, an aliquot ( $10\mu\text{l}$ ) of urine was plated directly on Cystine lactose  
145 electrolyte deficient agar (CLED), blood agar (BA), and MacConkey agar (Oxoid, Basingstoke,  
146 UK), and incubated aerobically at  $35\text{-}37^{\circ}\text{C}$  for 24 hours. After an overnight incubation,

147 quantification of colony forming units (cfu's) was done by counting the number of colonies on  
148 a plate and multiplying by the dilution factor, as previously described by Miles and Misra.<sup>19</sup>  
149 Pure bacterial growth yielding colony counts of  $\geq 10,000$  ( $10^4$ ) cfu/ml was interpreted as a  
150 confirmed UTI case. A mixed culture (with more than one colony type) or growth of  $< 10,000$   
151 ( $10^4$ ) cfu/ml were non-confirmatory for UTI.

152 The organisms were identified to the species level using colonial morphological characteristics  
153 on CLED, BA, MacConkey agar (Oxoid, Basingstoke, UK), Gram-stain (Sigma-Aldrich, USA)  
154 and standard biochemical tests. Sulfide Indole Motility test, Methyl Red, Oxidase, Urease,  
155 Triple Sugar Iron, and citrate utilization was used to identify Gram negative organisms.<sup>20</sup>  
156 Coagulase, Catalase, and haemolytic patterns on BA was used to confirm the presence of Gram-  
157 positive bacteria. Where necessary, the analytical profile index (API 20E) test was used to  
158 confirm the identity of strains following the manufacturer's guidelines (BioMerieux,  
159 Charbonnieres, LesBains, France).

## 160 **2.5.2 Antimicrobial susceptibility test**

161 Antimicrobial susceptibility testing (AST) was performed according to the Kirby Bauer disc  
162 diffusion method.<sup>21</sup> The panel of antibiotic discs (Oxoid, Basingstoke, UK) tested included first  
163 line; amoxicillin-clavulanic-acid (20/10  $\mu\text{g}$ ), nitrofurantoin (300  $\mu\text{g}$ ), sulfamethoxazole  
164 trimethoprim (23.75/1.25  $\mu\text{g}$ ), and second- line; ciprofloxacin (5  $\mu\text{g}$ ) antibiotics used in the  
165 treatment of UTI as per local practice.<sup>16</sup> Other antibiotics included in the panel were  
166 ceftazidime (30  $\mu\text{g}$ ), ceftriaxone (30  $\mu\text{g}$ ), cefepime (30  $\mu\text{g}$ ), ceftoxitin (30  $\mu\text{g}$ ), gentamycin (10  
167  $\mu\text{g}$ ), cefuroxime (30  $\mu\text{g}$ ), erythromycin (15  $\mu\text{g}$ ), and linezolid (30  $\mu\text{g}$ ). Susceptibility or  
168 resistance to the tested antibiotics were determined using the zone diameter interpretative  
169 criteria (breakpoints) according to the CLSI guidelines.<sup>22</sup> Isolates that showed intermediate  
170 resistance to a given antibiotic were interpreted as resistant to that antibiotic. *E. coli* (ATCC-

171 25922) and *S. aureus* (ATCC-25923) were used as quality control organisms to validate  
172 antibiotic discs potency and quality of the test media.

## 173 **2.6 Evaluation of the appropriateness of empirical treatment**

174 Appropriateness of empiric treatment was assessed by evaluating the treatment prescribed  
175 during the initial hospital visit with the subsequent laboratory urine culture and susceptibility  
176 results. The hospital visit during which the patient was recruited, and urine sample obtained,  
177 was defined as the initial visit. Empirical treatment was taken as any antibiotic treatment  
178 prescribed to the patient during the initial visit prior to urine culture results. Appropriateness  
179 was assessed on an individual patient basis for those patients whose urine specimen yielded  
180 significant bacterial growth for UTI ( $\geq 10^4$  cfu/ml). Appropriate empirical antibiotic therapy  
181 (AEAT) was considered if a UTI was confirmed on urine culture and the antibiotics prescribed  
182 were effective in inhibiting growth of the isolated pathogen *in vitro*.<sup>23</sup> Inappropriate empirical  
183 antibiotic therapy (IEAT) was defined as UTI confirmed on laboratory culture, but with an  
184 isolated pathogen which was resistant to the antibiotic prescribed *in vitro*.<sup>23</sup> AEAT was  
185 expressed as the percentage of patients with a culture positive urine specimen, and isolated  
186 pathogen tested as sensitive to the antibiotic prescribed. Conversely, IAET was expressed as  
187 the percentage of patients with a culture positive urine specimen who had an empiric  
188 prescription for which the isolated pathogen was tested as resistant.

## 189 **2.7 Statistical analysis**

190 Data were downloaded from epicollect into Microsoft Excel (Microsoft Corp, Redmond,  
191 Washington, USA) and were analysed using STATA 16 (StataCorp. 2019. Stata 183 Statistical  
192 Software: Release 16. College Station, TX: StataCorp LLC). The questionnaire data were  
193 linked to urinalysis, empirical prescription and AST data using anonymous patient identifiers.  
194 Baseline characteristics of the study population were reported as median (interquartile range



195 [IQR]) for age, or as counts and percentages for categorical data. Differences between  
196 categorical variables were compared using the  $\chi^2$  test or Fishers exact test where applicable.  
197 Statistical significance was considered at probability value of  $< 0.05$ .

## 198 **2.8 Ethical approval**

199 This study received approval from University of St. Andrews Teaching and Research Ethics  
200 Committee, United Kingdom [Approval no. MD15749]; Jomo Kenyatta University of  
201 Agriculture and Technology Institutional Ethics Review Board, Kenya [Approval no.  
202 JKU/IERC/02316/0166], National Commission for Science Technology and Innovation,  
203 Kenya [Approval no. P/21/12520]. Nairobi Metropolitan services, MLKH and MDH provided  
204 approvals for access to the study sites. Informed consent was obtained from each participant  
205 included in the study.

## 206 **3. Results**

### 207 **3.1. Characteristics of study participants**

208 Participants characteristics are shown in **Table 1**. Five hundred and fifty-two were enrolled.  
209 The majority were adult outpatients 494 (89.4%), and females accounted for 398 (72%). The  
210 most frequent age bracket was 21-30 with a median age of 29 years (IQR:24-36). Among the  
211 552 enrolled patients, 236 (43%) had taken medication 2 weeks prior to enrolment, 168 (71%)  
212 of these had taken antibiotics, while 68 (29%) had taken medications other than antibiotics.

213

214

215

216

217

218 **Table 1: Basic demographic characteristics of participants**

| Variable                                           | Response              | UTI (+) *         | UTI (-) *         |
|----------------------------------------------------|-----------------------|-------------------|-------------------|
|                                                    |                       | n (%)             | n= (%)            |
| Average                                            |                       | <b>124 (22.5)</b> | <b>428 (77.5)</b> |
| Gender                                             | Male                  | 32 (26)           | 122 (29)          |
|                                                    | Female                | 92 (74)           | 306 (71)          |
| Age                                                | 5-10                  | 9 (7.2)           | 21 (5)            |
|                                                    | 11-20                 | 12 (9.6)          | 37 (8.6)          |
|                                                    | 21-30                 | 56 (45)           | 183 (43)          |
|                                                    | 31-40                 | 25 (20)           | 103 (24)          |
|                                                    | 41-50                 | 12 (9.6)          | 54 (13)           |
|                                                    | >50                   | 10 (8)            | 30 (7)            |
| Medication taken in two weeks prior to recruitment | No medication         | 76 (61)           | 240 (56)          |
|                                                    | Yes-antibiotics       | 37 (30)           | 131 (31)          |
|                                                    | Yes-other medications | 11 (8.8)          | 57 (13)           |

219

220 Demographic and clinical characteristics of study participants. KEY: UTI (+) \*-Culture  
 221 confirmed UTI positive, UTI (-) \*-Culture confirmed UTI negative.

### 222 **3.2 Proportion of microbiologically confirmed UTI**

223 The overall proportion of culture confirmed UTI among the studied population was 22.5%,  
 224 (124/552), being significantly higher in females than males, **Table 1**. Of these, 274 (49.6%)  
 225 received empirically prescribed antibiotic treatment, 242 (43.8%) did not receive any antibiotic  
 226 treatment, while for 36 (6.5%), it was not known whether they received an antibiotic or not  
 227 (participants could not be reached by phone or failed to come back to the hospital for the  
 228 laboratory results). Amongst the 274 that received empirical antibiotic therapy, urine culture  
 229 confirmed UTI in 95 (35%). Of the 242 that didn't receive therapy, 27 (11.1%) had UTI  
 230 confirmed. Among those whose therapy status was not known, 2 (5.5%) had confirmed UTI.  
 231 There was a significant difference in UTI detection between those who received empirical  
 232 therapy and those who did not, p-value of <0.05.

### 233 **3.3 Microbiological characteristics**

234 A total of 124 bacterial isolates were characterised from the 552 urine samples analysed, 97  
235 (78%) of which were Gram-negative. The predominant uropathogen was *Escherichia coli* 64  
236 (52%); followed by *Klebsiella* spp. 21 (17%); *Staphylococcus aureus*, 14 (11.3%); coagulase  
237 negative *Staphylococcus* (CoNS), 7 (5.6%); *Enterococcus faecalis*, 6 (4.8%), *Proteus* spp. 7  
238 (5.6%); and *Acinetobacter baumannii*, 1 (0.8%). *Pseudomonas aeruginosa* 2 (1.6), and  
239 *Citrobacter koseri* 2 (1.6%).

### 240 **3.4 Antimicrobial resistance patterns**

241 Antimicrobial resistance profiles of the 124 isolated UTI pathogens are shown in **Table 2**. For  
242 Gram negative organisms, resistance towards common UTI treatments - $\beta$ -lactams,  
243 fluoroquinolones, and aminoglycosides (BFQA) ranged from 24% to 57%. Within the bacterial  
244 groups, *E. coli*, the predominant uropathogen, showed high resistance to  
245 sulfamethoxazole/trimethoprim at 77%, ciprofloxacin at 61%, amoxicillin-clavulanic acid at  
246 47%, and ceftriaxone at 52%, while nitrofurantoin was the most effective agent for *E. coli*. The  
247 overall resistance of Gram-positive bacteria was 52% for sulfamethoxazole trimethoprim, 67%  
248 for ciprofloxacin, and 26% for amoxicillin-clavulanic-acid. Nitrofurantoin and linezolid were  
249 the most effective agents against Gram-positive isolates.

250

251

252  
253

**Table 2: Antimicrobial resistance profiles of isolated UTI pathogens**

| Organism groups        | No. of Organisms tested | Antimicrobial resistance n (%) <sup>2</sup> |        |        |        |        |        |        |        |        |        |        |        |     |     |
|------------------------|-------------------------|---------------------------------------------|--------|--------|--------|--------|--------|--------|--------|--------|--------|--------|--------|-----|-----|
|                        |                         | n <sup>1</sup>                              | AMP    | AMC    | CAZ    | CRO    | FEP    | FOX    | GEN    | CIP    | SXT    | NIT    | CXM    | ERY | LNZ |
| <i>E. coli</i>         | 64                      | 53(83)                                      | 30(47) | 29(45) | 33(52) | 29(45) | 8(12)  | 15(22) | 39(61) | 49(77) | 3(5)   | 58(91) | N/A    | N/A |     |
| <i>Klebsiella</i> spp. | 21                      | 20(95)                                      | 13(62) | 13(62) | 14(67) | 14(67) | 6(29)  | 7(33)  | 19(91) | 14(67) | 10(48) | 19(91) | N/A    | N/A |     |
| <i>Proteus</i> spp.    | 7                       | 4(57)                                       | 4(57)  | 0      | 0      | 0      | 0      | 1(14)  | 2(29)  | 4(57)  | 7(100) | 3(43)  | N/A    | N/A |     |
| <i>P. aeruginosa</i>   | 2                       | 2(100)                                      | 2(100) | 1(50)  | 1(50)  | 0      | 2(100) | 0      | 0      | 2(100) | 2(100) | 2(100) | N/A    | N/A |     |
| <i>C. koseri</i>       | 2                       | 1(50)                                       | 0      | 0      | 1(50)  | 0      | 0      | 0      | 0      | 0      | 1(50)  | 1(50)  | N/A    | N/A |     |
| <i>A. baumannii</i>    | 1                       | 1(100)                                      | 1(100) | 1(100) | 1(100) | 1(100) | 1(100) | 1(100) | 1(100) | 1(100) | 1(100) | 1(100) | N/A    | N/A |     |
| <i>S. aureus</i>       | 14                      | 12(86)                                      | 4(29)  | N/A    | N/A    | N/A    | 3(21)  | 3(21)  | 8(57)  | 11(79) | 1(7)   | N/A    | 8(57)  | 0   |     |
| CoNS                   | 7                       | 7(100)                                      | 3(43)  | N/A    | N/A    | N/A    | 3(43)  | 1(14)  | 5(71)  | 1(14)  | 1(14)  | N/A    | 5(71)  | 0   |     |
| <i>E. faecalis</i>     | 6                       | 0                                           | 0      | N/A    | N/A    | N/A    | 6(100) | 6(100) | 5(83)  | 2(33)  | 1(17)  | N/A    | 6(100) | 0   |     |

254 **KEY:** AMP-Ampicillin; AMC-Amoxicillin-clavulanic acid; CAZ-Ceftazidime; CRO-Ceftriaxone; FEP-Cefepime; FOX- Cefoxitin; GEN-Gentamycin; CIP-Ciprofloxacin;  
 255 SXT-Sulfamethoxazole/Trimethoprim; NIT-Nitrofurantoin; CXM-Cefuroxime; ERY-Erythromycin; LNZ-Linezolid; CoNS-Coagulase negative staphylococci; n<sup>1</sup> -Number of  
 256 isolates within a particular species; n (%)<sup>2</sup> -frequency of resistant isolates in relation to n<sup>1</sup> expressed in percentage for individual antibiotics; N/A -not applicable, antibiotics not  
 257 tested in the isolates.

### 258 3.5 Empirical antimicrobial prescribing

259 There were 15 antibiotics and antibiotic combinations prescribed empirically. Most of the  
260 patients 244 (89.0%) received one antibiotic, 28 (10.2%) received 2 antibiotics, while 2 (0.7%)  
261 received 3 antibiotics, **Figure 2**. Antimicrobial treatment was prescribed to 49.6% of all  
262 patients, with a first line empirical treatment recommended in national guidelines utilised in  
263 29.6% of cases. The most frequently prescribed antibiotics were ciprofloxacin (30.3%),  
264 amoxicillin clavulanic acid (17.5%), levofloxacin (15.7%), nitrofurantoin (11.6%), and  
265 cefuroxime (10.6%), while the least prescribed were sulfamethoxazole trimethoprim (1.1%),  
266 and cefepime at (0.4%). Ceftriaxone/ciprofloxacin and cefixime/azithromycin were the most  
267 prescribed combination therapies at 4.7% and 3.2% respectively.

268

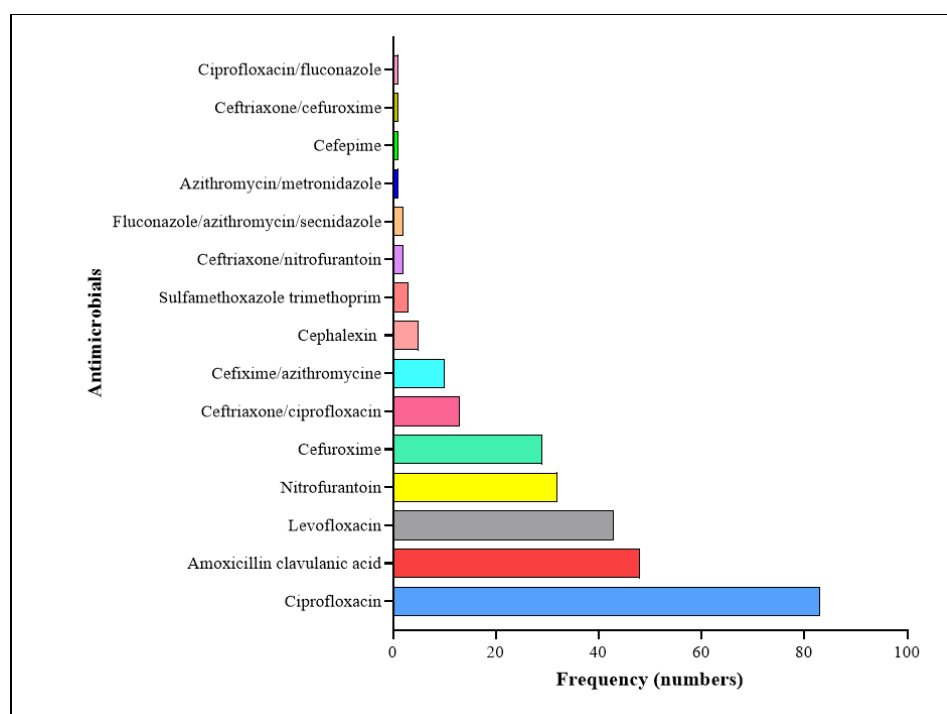

269

270 **Figure 2:** An overview of empirical antimicrobial prescribing at the outpatient departments of  
271 MLKH and MCH, Nairobi County, Kenya.

272

### 273 3.6. Appropriateness of empirical antibiotic treatment (AEAT)

274 Of the 95 patients with bacteriological confirmation of UTI, the antimicrobial susceptibility  
275 results were compared with the empirical therapy prescribed. The most prescribed antibiotics  
276 empirically were found to be inappropriate as follows: Ciprofloxacin was prescribed 27 times  
277 but in 11 cases (41%), the isolated organisms were resistant; for amoxicillin clavulanic acid, in  
278 12 (40%) out of the 30 prescriptions, organisms were resistant; for nitrofurantoin, 4 (27%) of  
279 the 15 prescriptions proved to be inappropriate, and finally, cefuroxime was prescribed 7 times,  
280 but 6 (88%) cases were inappropriate. Overall, most patients 50 (53%) received appropriate  
281 empirical therapy, while for 38 (40%), the therapy was found to be inappropriate. The  
282 appropriateness of empirical therapy to 7 (7%) patients could not be determined as the  
283 antibiotics prescribed (levofloxacin, cefixime/azithromycin) were not in the AST panel, **Figure**  
284 **3.**

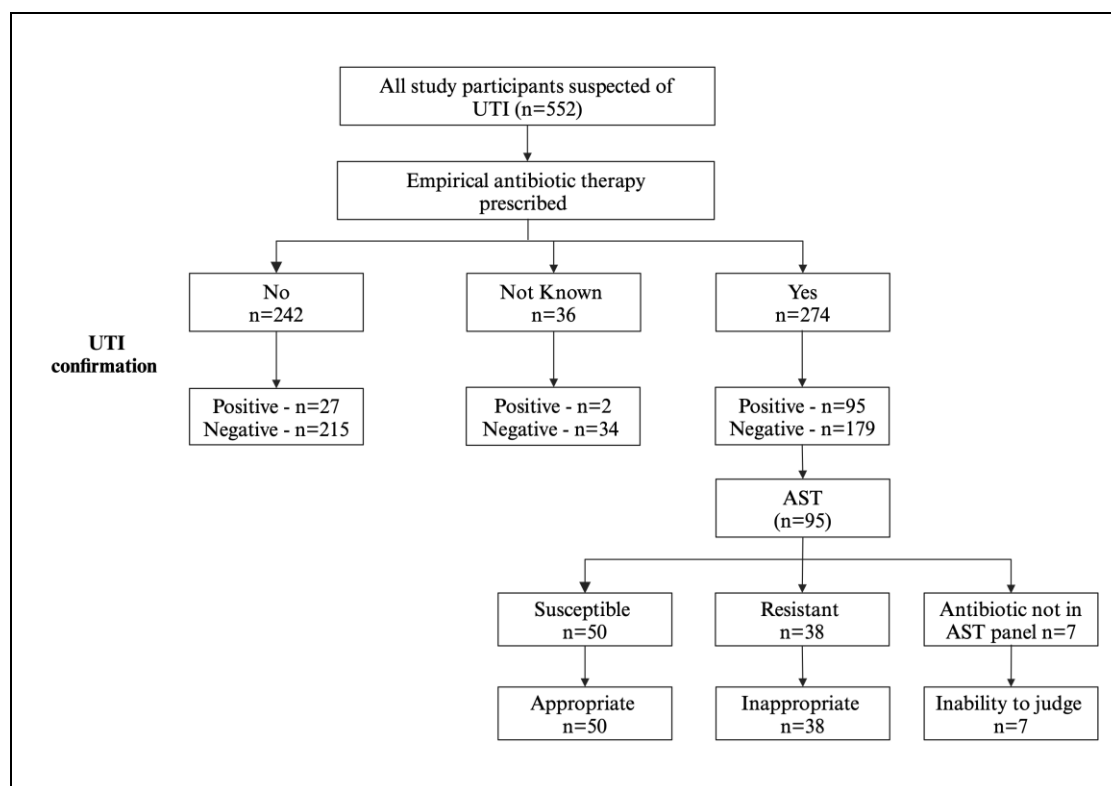

285

286 **Figure 3: Evaluation of appropriateness of empirical therapy.** Appropriateness or inappropriateness  
287 was expressed as a percentage based on n=95 patients who had laboratory confirmed UTI and had  
288 susceptible or resistant AST results respectively.

## 289 4. Discussion

290 This study determined the proportion of microbiologically confirmed UTI cases among 552  
291 symptomatic patients and evaluated the appropriateness of empiric antibiotic therapy  
292 prescribed to symptomatic UTI patients. Our findings suggest that in about 40% of cases,  
293 empirical antimicrobial prescribing for UTI proves inappropriate in the context of subsequent  
294 urine culture and susceptibility results. IEAT can be associated with significant adverse  
295 outcomes. While changing to the right antibiotic upon receipt of the culture results is beneficial  
296 and necessary for targeted therapy, it may not fully mitigate the disadvantages of not having  
297 the correct antibiotic from the onset.<sup>23</sup> IEAT may promote selection pressures that can result in  
298 the growth of resistant bacterial populations, which not only affects the individual patient, but  
299 also poses a broader public health threat to everyone. Furthermore, IEAT can result in  
300 unnecessary healthcare costs including expenses associated with additional tests and treatment  
301 for complications.<sup>24</sup> These consequences underscore the importance of judicious antibiotic  
302 prescribing to optimize patient outcomes and preserve the effectiveness of antibiotics for future  
303 generations.

304 It is challenging to find comparable studies because of the wide variation in the way that IEAT  
305 is defined. Nevertheless, a recent study by Maina *et al* investigated the appropriateness of  
306 antibiotic use across a range of disease conditions among 1502 patients in Kenyan public  
307 hospitals. Among other findings, these results showed that 26% of 94 patients who had UTI  
308 and 68% of 135 patients in the surgical unit received empirical treatment that was inappropriate  
309 for the pathogens isolated.<sup>25</sup> Higher rates ranging from 54% to 87% of IEAT in UTI have been  
310 reported by other studies.<sup>26-30</sup> However, while our study defined inappropriate treatment  
311 according to the criteria outlined by Davey *et al*,<sup>23</sup> these studies had a combination of  
312 definitions which included: antibiotic prescriptions without bacteriological confirmation,

313 prescription of an antibiotic to which isolated pathogen was resistant, inappropriate antibiotic  
314 dosage, lack of sensitivity testing, and therapy not being within the treatment guidelines.  
315 Overall, only 1 in 5 patients suspected of having UTI had bacteriological confirmation by the  
316 criteria applied in this study (monoculture growth of  $10^4$  cfu/ml). However, a considerable  
317 proportion of the patients 168 (30%), had taken antibiotics prior to the initial hospital visit.  
318 This highlights the challenge of conducting and interpreting microbiology culture results in  
319 patients previously exposed to antibiotics, as prior research has demonstrated that antibiotic  
320 exposure is a strong predictor of negative culture outcomes.<sup>31</sup> This further illustrates the  
321 difficulty healthcare providers face in deciding on the need for antibiotic prescriptions based  
322 solely on clinical symptoms. Evidence on how well symptoms predict the true presence of UTI  
323 when compared with urine culture has shown varied results, and is estimated to have an error  
324 rate of up to 33%.<sup>31</sup> In this study, 11% of patients had laboratory confirmation of UTIs, yet they  
325 did not receive empirical treatment. These findings are comparable to those reported by Zhue  
326 *et al* and Rama *et al*, in which 15.7% and 12.5% patients respectively, did not receive empirical  
327 treatment but were confirmed to have UTI by the culture method.<sup>26,29</sup> While treating only after  
328 the microbiological results are obtained ensures that the correct antimicrobial therapy is chosen,  
329 the strategy increases the risk of a worse outcome. These findings highlights the need of a near  
330 point-of-care test that can detect UTI and provide preliminary antimicrobial susceptibility  
331 reports to guide decision-making in UTI management.

332 There was a wide variation of empirical antimicrobial prescribing practise among prescribers,  
333 with differences in preference for certain antimicrobials seen. This was most striking in relation  
334 to the prescription of fluoroquinolones (ciprofloxacin, levofloxacin),  $\beta$ -lactam/ $\beta$ -lactamase  
335 inhibitor combinations (AMC), and nitrofurantoin. Despite being a second line therapy, more  
336 than half 140 (51%) of the patients received fluoroquinolones. This is high considering the  
337 already reported high resistance<sup>32</sup> and adverse ecological effects<sup>33</sup> associated with this class of



338 antimicrobials. A further 6.3% of the patients received sulfamethoxazole trimethoprim despite  
339 this antibiotic not being among the recommended empirical treatments,<sup>16</sup> and local resistance  
340 patterns already exceeding 20%.<sup>32</sup> One possible explanation to these findings is the absence  
341 of sufficient laboratory support, which influences prescription pattern and choice, leading to a  
342 predominance of broad-spectrum prescriptions and polypharmacy.<sup>34</sup> The high-grade resistance  
343 exhibited against amoxicillin-clavulanic-acid makes this agent suboptimal for UTI treatment  
344 in the absence of laboratory support, notwithstanding that it is recommended in the national  
345 guidelines as first-line empirical therapy. This illustrates a clear need for more comprehensive  
346 national surveillance and perhaps a review of the guidelines. In contrast, nitrofurantoin was an  
347 appropriate agent for both Gram-positive and Gram-negative bacteria, and its empirical use is  
348 encouraged in the absence of any contraindication.<sup>35</sup>

349 The high proportion of resistance amongst UTI pathogens reported in this study and in  
350 neighbouring countries,<sup>17,36</sup> can likely be explained by records of inappropriate antibiotic use  
351 which is one of the key drivers of AMR. This could be caused by inadequate microbiology  
352 diagnostics, lack of updated antibiotic susceptibility data, and self-treatment using over-the-  
353 counter antibiotics, a wide-spread practise in many LMICs.<sup>37</sup> Some challenges identified in  
354 laboratory diagnostics have been the long turnaround time (TAT), high cost of investigation  
355 and the lack of trust in and utilization of laboratory results by clinicians.<sup>38</sup> Performing culture  
356 and susceptibility tests may contribute to higher healthcare costs for patients. However, its  
357 essential to consider this added expense in light of the potential savings from avoiding  
358 inappropriate or unnecessary treatment that are not supported by laboratory data.

359 This study has some limitations. First, the patients were only recruited from the outpatient  
360 departments of two health facilities, so generalisation of findings to other settings, even within  
361 Kenya, should be made with caution. Nevertheless, patients were sequentially recruited without  
362 stringent selection criteria and the same approach was taken to investigation of every

363 participant which minimised bias and increased the likelihood that the results reflected the  
364 general population and routine medical practices. Further, the findings do not give insights into  
365 the appropriateness of prescription in private health facilities or in inpatients. However, it is  
366 considered satisfactory to provide background information on appropriateness of empirical  
367 treatment. Secondly, the population of outpatients who presented with symptoms suggestive of  
368 UTI may have had other underlying conditions given that UTI symptoms may over-lap with  
369 those of other diseases. However, we assumed that all antibiotics prescribed during initial  
370 hospital visit before the AST results (when each patient was recruited into the study and urine  
371 collected) were for the UTI episode.

## 372 **5. Conclusion**

373 The study has demonstrated that achieving appropriate empirical antibiotic treatment for UTIs  
374 is a difficult task, especially in the era of increased AMR in clinical infections, situations of  
375 limited resource, and much habitual over-the counter antibiotic use. At present, optimal empiric  
376 therapy is not being achieved. This situation could be improved if capacity for delivering  
377 accurate and timely susceptibility results to clinicians to aid their clinical decision making  
378 could be achieved. Finally, it is crucial to enhance routine AMR surveillance to support  
379 effective antimicrobial stewardship practices in healthcare facilities.

### 380 **Authors contribution**

381 HAO.: conceptualization, laboratory investigations, data curation, formal analysis, and original  
382 drafting of the manuscript. RJHH.: Conceptualization, supervision, reviewing and editing. DS.:  
383 Conceptualization, supervision, reviewing and editing MK.: Conceptualization, supervision,  
384 reviewing and editing KK.: Conceptualization, supervision, reviewing and editing. CWN.:  
385 Supervision of laboratory data collection in Kenya. HG.: Laboratory investigations and data  
386 curation.

387 **Acknowledgements**

388 The authors would like to thank all patients for their participation, and the laboratory and  
389 clinical teams at MLKH, MDH and KEMRI-CMR for their support during the study period.

390 **Funding**

391 This work was supported by the Scottish Funding Council (SFC) through the Global  
392 Challenges Research Fund (GCRF).

393 **Transparency declarations**

394 None to declare

395

396

397

398

399

400

401

402

403

404

405

406

407

408

409

410

## 411 References

- 412 1. Harbottle H, Thakur S, Zhao S *et al.* Genetics of antimicrobial resistance. *Anim*  
413 *Biotechnol.* 2006;**17**:111–24.
- 414 2. World Health Organization. Global Antimicrobial Resistance and Use Surveillance  
415 System 2022. <https://www.who.int/publications/i/item/9789240062702>
- 416 3. Neill JO'. Antimicrobial Resistance: Tackling a crisis for the health and wealth of  
417 nations. The Review on Antimicrobial Resistance, 2014.
- 418 4. Murray CJ, Ikuta KS, Sharara F *et al.* Global burden of bacterial antimicrobial resistance  
419 in 2019: a systematic analysis. *Lancet.* 2022;**399**:629–55.
- 420 5. Petti CA, Polage CR, Quinn TC *et al.* Laboratory Medicine in Africa: A Barrier to  
421 Effective Health Care. *Clin Infect Dis* 2006;**42**:377–82.
- 422 6. Elbireer AM, Jackson JB, Sendagire H *et al.* The Good, the Bad, and the Unknown:  
423 Quality of Clinical Laboratories in Kampala, Uganda. *PLoS One.* 2013;**8**:1–6.
- 424 7. Asiimwe BB, Kiiru J, Mshana SE *et al.* Protocol for an interdisciplinary cross-sectional  
425 study investigating the social, biological and community-level drivers of antimicrobial  
426 resistance (AMR): Holistic Approach to Unravel Antibacterial Resistance in East Africa  
427 (HATUA). *BMJ Open*2021;**11**:414-18. <http://bmjopen.bmj.com/>
- 428 8. Ndaki PM, Mushi MF, Mwangi JR *et al.* Dispensing antibiotics without prescription at  
429 community pharmacies and accredited drug dispensing outlets in tanzania: A cross-  
430 sectional study. *Antibiotics.* 2021;**10**:1–15.
- 431 9. Green DL, Keenan K, Fredricks KJ *et al.* The role of multidimensional poverty in  
432 antibiotic misuse: a mixed-methods study of self-medication and non-adherence in  
433 Kenya, Tanzania, and Uganda. *Lancet Glob Heal.* 2023;**11**:59–68.
- 434 10. Doron S, Davidson LE. Antimicrobial stewardship. *Mayo Clin Proc.* 2011;**86**:1113–23.
- 435 11. Morgan MG, McKenzie H. Controversies in the laboratory diagnosis of community-  
436 acquired urinary tract infection. *Eur J Clin Microbiol Infect Dis.* 1993;**12**:491–504.
- 437 12. Llor C, Bjerrum L. Antimicrobial resistance: Risk associated with antibiotic overuse and  
438 initiatives to reduce the problem. *Ther Adv Drug Saf.* 2014;**5**:229–41.
- 439 13. McCowan C, Bakhshi A, McConnachie A *et al.* *E. coli* bacteraemia and antimicrobial

- 440 resistance following antimicrobial prescribing for urinary tract infection in the  
441 community. *BMC Infect Dis.* 2022;**22**:1–10.
- 442 14. Mazzariol A, Bazaj A, Cornaglia G. Multi-drug-resistant Gram-negative bacteria  
443 causing urinary tract infections: a review. *J Chemother* 2017;**29**:2–9.  
444 <https://doi.org/10.1080/1120009X.2017.1380395>
- 445 15. Gupta K, Hooton TM, Naber KG *et al.* International clinical practice guidelines for the  
446 treatment of acute uncomplicated cystitis and pyelonephritis in women: A 2010 update  
447 by the Infectious Diseases Society of America and the European Society for  
448 Microbiology and Infectious Diseases. *Clin Infect Dis* 2011;**52**:103–20.  
449 <https://academic.oup.com/cid/article/52/5/e103/388285>
- 450 16. KNH. Kenyatta National Hospital-Guidelines for empiric antimicrobial therapy 2023.  
451 [https://healthsciences.uonbi.ac.ke/sites/default/files/2023-06/KNH](https://healthsciences.uonbi.ac.ke/sites/default/files/2023-06/KNH_Empiric_Antimicrobial_Therapy_Guidelines.pdf) Empiric  
452 Antimicrobial Therapy Guidelines.pdf
- 453 17. Maldonado-barragán AA, Mshana SE, Keenan K *et al.* Predominance of multidrug-  
454 resistant (MDR) bacteria causing urinary tract infections (UTIs) among symptomatic  
455 patients in East Africa: a call for action. *JAC-Antimicrobial Resist* 2023;**6**:1–36.  
456 <https://doi.org/10.1101/2023.06.13.23291274>
- 457 18. Iskandar K, Molinier L, Hallit S *et al.* Surveillance of antimicrobial resistance in low-  
458 and middle-income countries: a scattered picture. *Antimicrob Resist Infect Control.* 2021  
459 ;**10**: 63-82.
- 460 19. Miles AA, Misra SS, Irwin JO. The estimation of the bactericidal power of the blood. *J*  
461 *Hyg (Lond).* 1938;**38**:732–49.
- 462 20. Chesbrough M. District Laboratory Practice in Tropical countries, Part 2, Second  
463 Edition. Cambridge University Press, UK; 2006.
- 464 21. Bauer, A. W., Kirby, W. M. M., *et al* Antibiotic susceptibility testing by a standardized  
465 single disk method. *Am J Clin Pathol.* 1966;**45**:493.
- 466 22. CLSI. Performance Standards for Antimicrobial Disk Suspectibility Tests, Approved  
467 Standard-Thirteenth Edition. M02. 2018.
- 468 23. Davey PG, Marwick C. Appropriate vs. inappropriate antimicrobial therapy. *Clin*  
469 *Microbiol Infect* 2008;**14**:15–21. <http://dx.doi.org/10.1111/j.1469-0691.2008.01959.x>

- 470 24. Esparcia A, Artero A, Eiros JM *et al.* Influence of inadequate antimicrobial therapy on  
471 prognosis in elderly patients with severe urinary tract infections. *Eur J Intern Med*  
472 2014;**25**:523–7. <http://dx.doi.org/10.1016/j.ejim.2014.04.009>
- 473 25. Maina M, Mwaniki P, Odira E *et al.* Antibiotic use in Kenyan public hospitals:  
474 Prevalence, appropriateness and link to guideline availability. *Int J Infect Dis*  
475 2020;**99**:10–18. <https://doi.org/10.1016/j.ijid.2020.07.084>
- 476 26. Alkhawaldeh R, Farha RA, Hammour KA *et al.* The Appropriateness of Empiric  
477 Treatment of Urinary Tract Infections in a Tertiary Teaching Hospital in Jordan: A Cross-  
478 Sectional Study. *Antibiotics*. 2022;**11**: 629.
- 479 27. Vellinga A, Cormican M, Hanahoe B *et al.* Antimicrobial management and  
480 appropriateness of treatment of urinary tract infection in general practice in Ireland.  
481 *BMC Fam Pract*. 2011;**12**:108
- 482 28. Tünger Ö, Dinç G, Özbakkaloglu B *et al.* Evaluation of rational antibiotic use. *Int J*  
483 *Antimicrob Agents*. 2000;**15**:131–5.
- 484 29. Zhu H, Chen Y, Hang Y *et al.* Impact of inappropriate empirical antibiotic treatment on  
485 clinical outcomes of urinary tract infections caused by Escherichia coli: a retrospective  
486 cohort study. *J Glob Antimicrob Resist* 2021;**26**:148–53.  
487 <https://doi.org/10.1016/j.jgar.2021.05.016>
- 488 30. Marquet K, Liesenborgs A, Bergs J *et al.* Incidence and outcome of inappropriate in-  
489 hospital empiric antibiotics for severe infection: A systematic review and meta-analysis.  
490 *Crit Care* 2015;**19**:63.
- 491 31. Schmiemann G, Kniehl E, Gebhardt K *et al.* The Diagnosis of Urinary Tract Infection.  
492 *Dtsch Ärzteblatt Int* 2010;**107**:361–7.
- 493 32. Kiiru S, Maina J, Katana J *et al.* Bacterial etiology of urinary tract infections in patients  
494 treated at Kenyan health facilities and their resistance towards commonly used  
495 antibiotics. *PLoS One* 2023;**18**:277–279.  
496 <http://dx.doi.org/10.1371/journal.pone.0277279>
- 497 33. Stahlmann R, Lode HM. Risks associated with the therapeutic use of fluoroquinolones.  
498 *Expert Opin Drug Saf* 2013;**12**:497–505.  
499 <https://www.tandfonline.com/doi/abs/10.1517/14740338.2013.796362>

- 500 34. Chokshi A, Sifri Z, Cennimo D, *et al.* Global contributors to antibiotic resistance. *J Glob*  
501 *Infect Dis* 2019;**11**:36–42.
- 502 35. Pouwels KB, Freeman R, Muller-Pebody B *et al.* Association between use of different  
503 antibiotics and trimethoprim resistance: Going beyond the obvious crude association. *J*  
504 *Antimicrob Chemother* 2018;**73**:1700–7.
- 505 36. Silago V, Moremi N, Mtebe M *et al.* Multidrug-Resistant Uropathogens Causing  
506 Community Acquired Urinary Tract Infections among Patients Attending Health  
507 Facilities in Mwanza and Dar es Salaam, Tanzania. *Antibiotics*. 2022;**11**:1–13.
- 508 37. Do NTT, Vu HTL, Nguyen CTK *et al.* Community-based antibiotic access and use in  
509 six low-income and middle-income countries: a mixed-method approach. *Lancet Glob*  
510 *Heal*. 2021;**9**:610–9.
- 511 38. Alemnji GA, Zeh C, Yao K *et al.* Strengthening national health laboratories in sub-  
512 Saharan Africa: A decade of remarkable progress. *Trop Med Int Heal*. 2014;**19**:450–8.
- 513
- 514
- 515
- 516
- 517
- 518
- 519
- 520
- 521
- 522
- 523
